# Supplementary material for: The Rab11 effectors Fip5 and Fip1 regulate zebrafish intestinal development
Source: PubMed Central journal article supplement (PMC7595698; doi:10.1242/bio.055822), 2020-10-23
Supplement: biolopen-9-055822-s1.pdf [file biolopen-9-055822-s1.pdf]

|                |                |                                                                |                                                              |
|----------------|----------------|----------------------------------------------------------------|--------------------------------------------------------------|
| <b>A</b>       | HumanFIP5      | 1                                                              | MALVRGAEPAAGFSRWLPTHVQVTVLRARGLRGKSSGAGSTSDAYTVIQVGREKYSTSVV |
|                | DogFIP5        | 1                                                              | MALVRGAEPAAGFSRWLPTHVQVTVLRARGLRGKSSGAGSTSDAYTVIQVGREKYSTSVV |
|                | ZebrafishFip5a | 1                                                              | MSLAKS-D---EDQRWVPTHVQVTVLRARGLRAKG--KHGTSADVYTIQLGKEKYSTCVM |
|                | ZebrafishFip5b | 1                                                              | MPLISLDD---EEQRWVPTHVNVTVLRARALRTKG--KQGSRYVYTIIQVGKEYTTGLV  |
| HumanFIP5      | 61             | EKTHGCPWERECSFELPPGALDGLLRAQADAGPAPWAASSAAACELVLTMMHRSLIGV     |                                                              |
| DogFIP5        | 61             | EKTPGCPWERECSFELPPGALDGLLRAQADAGSAPWAAGSAAACELVLTMMHRSLIGV     |                                                              |
| ZebrafishFip5a | 55             | EKT-T-DPEWGECSFELQPGILEEGR-----DAY---PPGSGDLTLMVHRALIGL        |                                                              |
| ZebrafishFip5b | 56             | EKAE-EPQWGECAFELLPGLLEAGGT-----SAY---PPGSSNLVFTVMHRVLIIGL      |                                                              |
| HumanFIP5      | 121            | DKFLGQATVALDEVFGAGRAQHTQWYKLSKPGKKEKERGEIEVTIQFTRNNLSASMFDL    |                                                              |
| DogFIP5        | 121            | DKFLGQATVALDEVFGAGRAQHTQWYKLSKAGKKEKERGEIQVTIQFTRNNLSASMFDL    |                                                              |
| ZebrafishFip5a | 103            | DVFLGQAVLPLHKAFQDRKSKKNEWHRLHSKTGKKEKERGELQLSVQFTRHNLTASMYDL   |                                                              |
| ZebrafishFip5b | 104            | DVFLGQTVPLDKVFEQGTCPRNEWLKLSKAGRKEKERGELQVTIQFTRNNMTASMYDL     |                                                              |
| HumanFIP5      | 181            | SMKDKPRSFPFSKIRDKMKGKKKY-DLESASAILPSSA-----I-ED                |                                                              |
| DogFIP5        | 181            | SMKDKPRSFPFSKIKDKMKGKKKF-DLESASAILPSSA-----L-ED                |                                                              |
| ZebrafishFip5a | 163            | SMKDKPRSAFDKLRERMRAKKRPAEEDSSAIVPGGYGALARMRGRLP-SDGGGEEEDYED   |                                                              |
| ZebrafishFip5b | 164            | TVKDKPRSAFGKLDKRVTKGKR-D-VESSAVLPGRYAALSGSVGPPFAGDGGSYEA-SE    |                                                              |
| HumanFIP5      | 220            | PDLGSLGKMGKAKGFFLRNKLKSSLTQSNSTSLGSDSTLSSASGSLAYQGPQA---ELL    |                                                              |
| DogFIP5        | 220            | PELGSGLGKMGKAKGFFLRNKLKSSLTQSNSTSLGSDSTLSSASGSLAYQGPQT---ELL   |                                                              |
| ZebrafishFip5a | 222            | -DEGGEARRSKMRSFFLRGRLRKSSDTRSSSTSLGSESESSSRGGSLSPTAGISVVVSDL   |                                                              |
| ZebrafishFip5b | 221            | -EDGVEEHRSKVKDFFLKGLKLRKNSDTRSCSSLASDSMASAGDPFIPV-----EI       |                                                              |
| HumanFIP5      | 276            | TRSPSRSSWLSTEGGRDQAQSPK--LFTHKRTYSDEANQMRVAPPRALLDLQGHDA---    |                                                              |
| DogFIP5        | 276            | THSPSRSSWLSTEGGRDSTQSPK--LLTHKRTYSDEASQMRVAPPRSLDLQGHDA---     |                                                              |
| ZebrafishFip5a | 281            | SNSPSSNLTADNSPEHTVAPSPQVSPVRHVMYD---ISLPVPHS-----MMSDNDT       |                                                              |
| ZebrafishFip5b | 272            | PRTPPIYSSRVMEFFRMDTEEAIK--VMTHKRAHSDEASKITCVPRPS-----PAVEN---  |                                                              |
| HumanFIP5      | 331            | -ASRSSLVCVNGSHIYNEEPQGPVR-----HRSSISGSL-----                   |                                                              |
| DogFIP5        | 331            | -ASRSSLVCVNGSHIYNEEPQAPLR-----HRSSISGPF-----                   |                                                              |
| ZebrafishFip5a | 331            | PILLPSVCVNGNPFVETS----PLTHHPPTLVLQHQ-PQQESTKFPITQSQGPQATKLPKPE |                                                              |
| ZebrafishFip5b | 322            | -LSQSTLCINGSHIYSSEPVSPKSP--SAIPAKRSLLEKCA-----                 |                                                              |
| HumanFIP5      | 363            | -----PSSGSLQAVSSRFSEEGPR--STDDTWPRGSRNSSS                      |                                                              |
| DogFIP5        | 363            | -----PPSSLHSVSRPAEESR--PTDSSGGRGSRSTSSS                        |                                                              |
| ZebrafishFip5a | 386            | KSQESKPRPEPRLPALGVLQKGLSLSLQNLRSRQ-GKEKQNGGPVD--GRRWSFDKPGE    |                                                              |
| ZebrafishFip5b | 360            | -----PLSRSLQNLTRR-GEDSQK--SD--GRRWSIDKSKK                      |                                                              |
| HumanFIP5      | 398            | EAVLGQEELSAQAKVLAPGASHPGEEEGARLPEGKPVQV--ATPivasseVAEKEGARK    |                                                              |
| DogFIP5        | 398            | EMLPGQEELSSQAKVLATGTRSSEEGARLPEGKPVQV--ATPLvasseVAEKEGARK      |                                                              |
| ZebrafishFip5a | 442            | E-----EKAIVA-ALEHAGR--VTDEPVNETVIRAG-----ETE                   |                                                              |
| ZebrafishFip5b | 391            | E-----DLETNA-QSQTQGSTIVDGKPVQA--AGAVD-----VLD                  |                                                              |
| HumanFIP5      | 456            | EERKPRMGLFHHHQGLSRSELGRRSSLGKGGPIL-GASPHSSSGEEKAKSSWFGLE       |                                                              |
| DogFIP5        | 456            | EERKPRMGLFHHHQGLSRSELGRRSSLGKGGPTQ-GASPHSSSGEEKAKSSWFGLE       |                                                              |
| ZebrafishFip5a | 474            | TQGGKRRGLFSS-----GKGDSSAGK--PITSKEETEHAQPLVEVKHKWFSS--         |                                                              |
| ZebrafishFip5b | 424            | KGKLRKTLFSS-----GRSDSLPAK--P-----EQGQVSAPEGRRGWFGS--           |                                                              |
| HumanFIP5      | 515            | AKDPTQKPSPHVKPLSAAPVEGSPDRKQSRSSLSIALSSGLEKLTV-TSGSIQVPTQA     |                                                              |
| DogFIP5        | 515            | AKEPTQKPSPHVKPLSAASLEGSPDKQSRSSLSIALSSGLEKLTV-TSGSVQPVAPA      |                                                              |
| ZebrafishFip5a | 520            | -KDSHSKPSPHVKPLTPPDE---KRSEGR-----SVLEKLTSTHSGRSDA---          |                                                              |
| ZebrafishFip5b | 465            | -GDSQNKPSPHVKPLTNNTLQGE-KKAESR-----SVLEKLTSTINPGRSALATTA       |                                                              |
| HumanFIP5      | 574            | PQAGQMVDTKRLKDSAVLDQSAKYHLTHDELISLLQRELERLSQRDE-----           |                                                              |
| DogFIP5        | 574            | PHVGQTVDTKRLKDSVGLDQSAKYHLTHDELISLLQRELERLSQRDE-----           |                                                              |
| ZebrafishFip5a | 563            | -----DKKPLVEGGGSYHLNHSELVNLIIQRDMELRQEREYEKRGMLLEKR            |                                                              |
| ZebrafishFip5b | 515            | EEE-----KQQLSLMEARAHYQNMTEMLIALLLQQELEIKKQRAETEVEVQVMLEKR      |                                                              |
| HumanFIP5      | 622            | -----HVQELSYIDRLLVRIMETSPTLLQIPGPPK                            |                                                              |
| DogFIP5        | 622            | -----HVQELSYIDRLLVRIMETSPTLLQIPDPFK                            |                                                              |
| ZebrafishFip5a | 611            | ETDLKMKKLLIKDLEDYIDTLLVRIMEQTPTLLQVVRPK-MK                     |                                                              |
| ZebrafishFip5b | 567            | DAELKMKKQVRDLEDYIDKLLVRIMEQTPTLLQVRGR-LK                       |                                                              |

**B Fip5b Exon 2**  
 WT Fip5b: WLKLSKAGRKEKERGELQVTIQFTRNNMTASMYDLTVKDKPRSAFGKLDKRVTKGKRDESSAVLPGRYA  
 ALSGVSVPFAGDGGSYEASEEDGVEEHRSKVKDFFLKGLKLRKNSDTRSCSSLASD  
 Fip5b<sup>C040</sup>: ALSGVSVPFAGDGGSYEASEEDGVEEHGVVEEVRSKTSFStop  
 Fip5b<sup>C043</sup>: ALSGVSVPFAGDGGSYEASEEDGVEEHRSKTSFStop

**C Fip5a Exon 1**  
 WT Fip5a: MSLAKSDEDQRWVPTHVQVTVLRARGLRAKGKHTSDVYTIQLGKEKYSTCVMKTTDPEWGECSFEL  
 Fip5a<sup>C035</sup>: MSLAKSDEDQRWVPTHVQVTVLRARGLREGQTRHQRRVHHHPAGQGEILHVRDGEDYRSGMGRGMLVStop  
 Fip5a<sup>C038</sup>: MSLAKSDEDQRWVPTHVQVTVLRARGLRVTStop

**Figure S1.** (A) Protein alignments for human FIP5, dog FIP5, and zebrafish paralogs Fip5a and Fip5b. The yellow highlighted region denotes the C2 domain and the blue highlighted region denotes the Rab-binding domain. (B) Fip5b exon 2 sequence in wild-type, *fip5b*<sup>CO40</sup> mutant, and *fip5b*<sup>CO43</sup> mutant alleles. Red amino acids show where mutants differ from wild-type allele. (C) Fip5a exon 1 sequence in wild-type, *fip5a*<sup>CO35</sup> mutant, and *fip5a*<sup>CO38</sup> mutant alleles. Red amino acids show where mutants differ from wild-type allele.

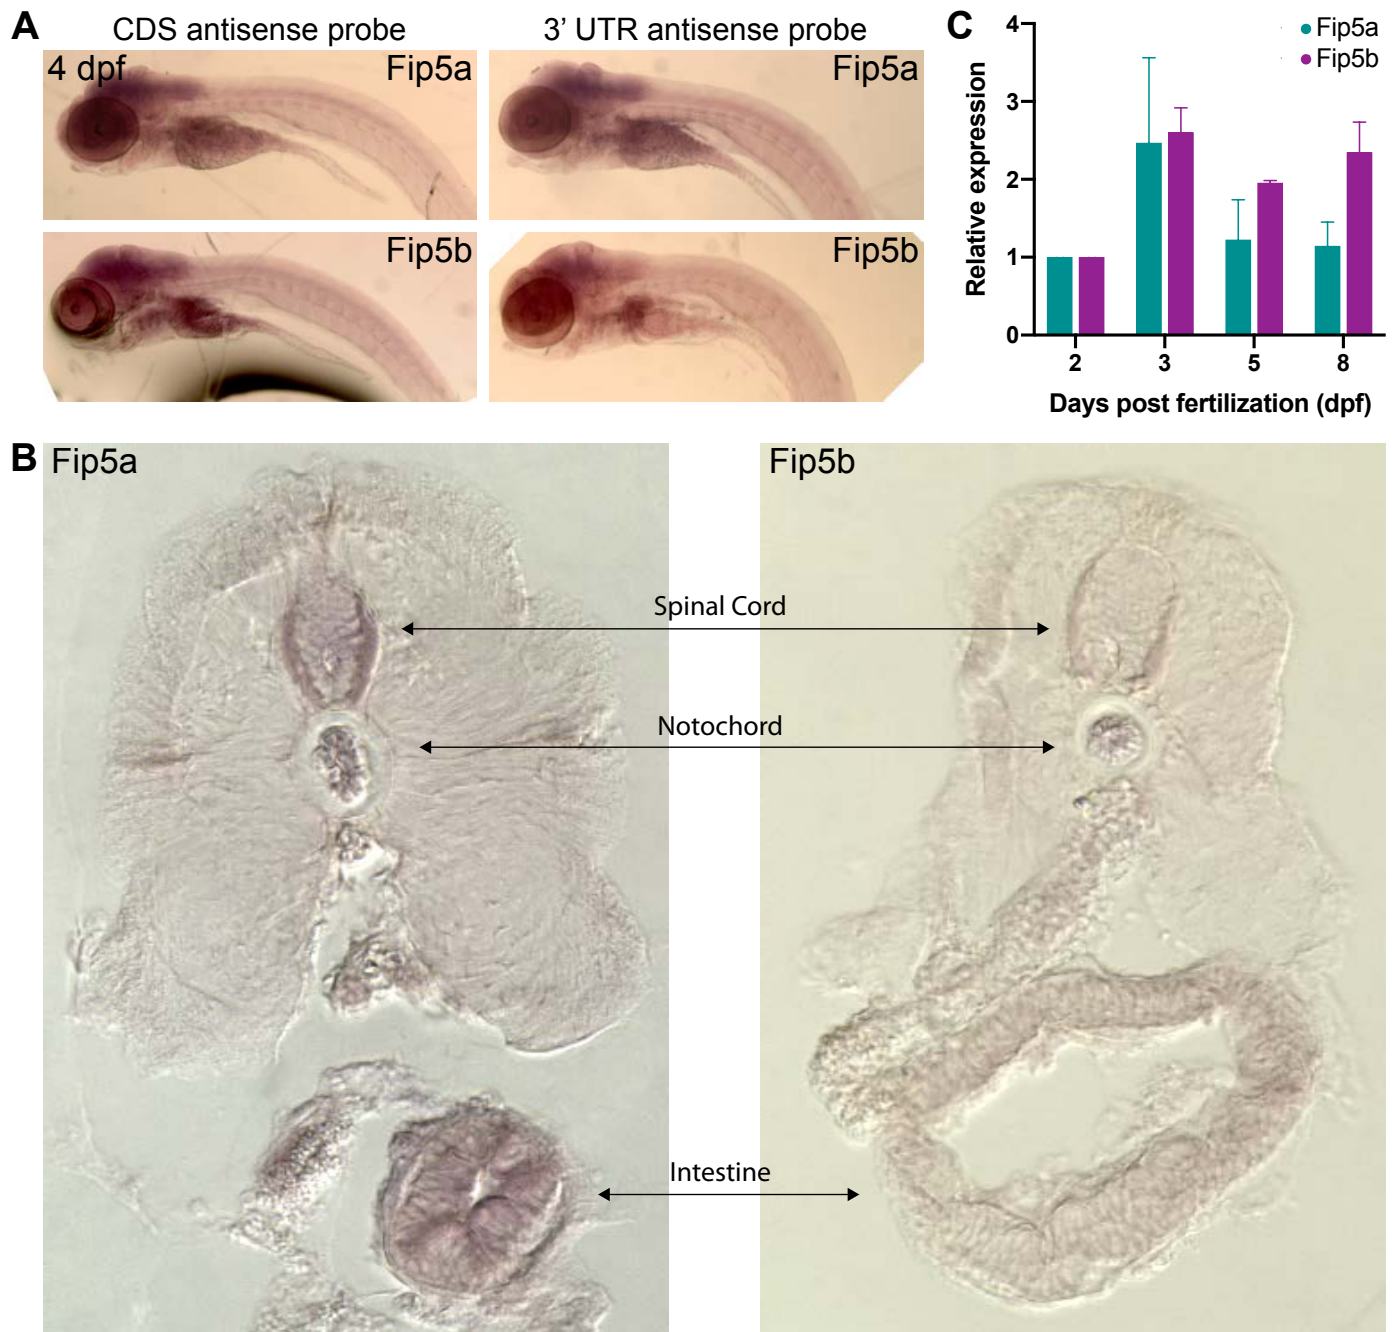

**Figure S2.** *In situ* hybridization on 4 dpf larvae with antisense probes for the coding sequences of *fip5a* and *fip5b* (left panel) and the 3' UTR sequences of *fip5a* and *fip5b* (right panel). (B) Representative cross sections of *fip5a* and *fip5b* antisense coding sequence probes. (C) qRT-PCR measuring *fip5a* and *fip5b* transcript levels at 2, 3, 5, and 8 dpf normalized to levels at 2 dpf. Three independent experiments were performed. All plots show mean  $\pm$  s.e.m.

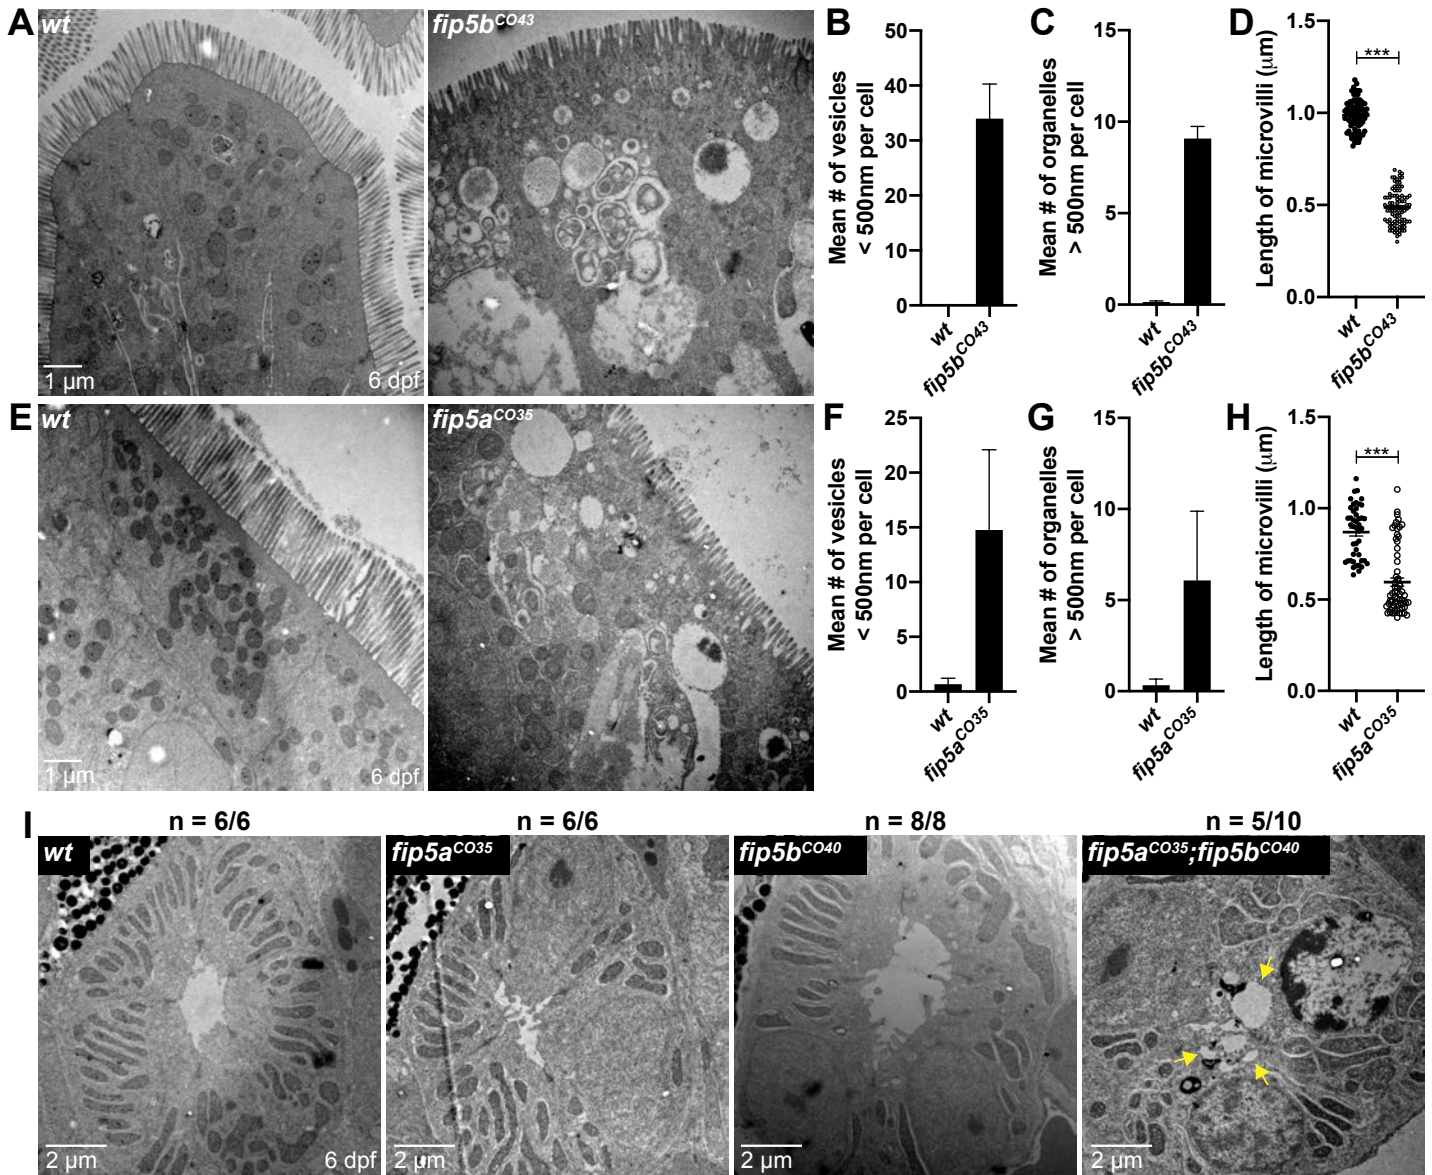

**Figure S3.** All following images are representative cross sections through midgut region on 6 dpf larvae. Wild-type siblings are used as controls. For A-G, three separate animals for each condition were analyzed. (A) Electron micrographs showing wild-type and *fip5b<sup>CO43</sup>* mutant larvae. (B) Quantitation of less than 500nm apical vesicles. (C) Quantitation of greater than 500nm organelles. (D) Quantitation of midgut microvilli length. Each dot represents a single microvillus length combined across three animals. (E) Electron micrographs showing wild-type and *fip5a<sup>CO35</sup>* mutant larvae. (F) Quantitation of less than 500nm apical vesicles. (G) Quantitation of greater than 500nm organelles. (H) Quantitation of midgut microvilli length. Each dot represents a single microvillus length combined across three animals. (I) Electron micrographs of kidneys in wild-type, *fip5b<sup>CO40</sup>* mutant, *fip5a<sup>CO35</sup>* mutant, and *fip5a<sup>CO35</sup>; fip5b<sup>CO40</sup>* double mutant larvae. N indicates number of representative kidneys out of total number of kidneys analyzed. Arrows point to multiple lumens in *fip5a<sup>CO35</sup>; fip5b<sup>CO40</sup>* double mutant larvae. All plots show mean  $\pm$  s.e.m. A t-test was used for Gaussian data and a Mann-Whitney test for all other statistics. \*\*\*P < 0.0005.



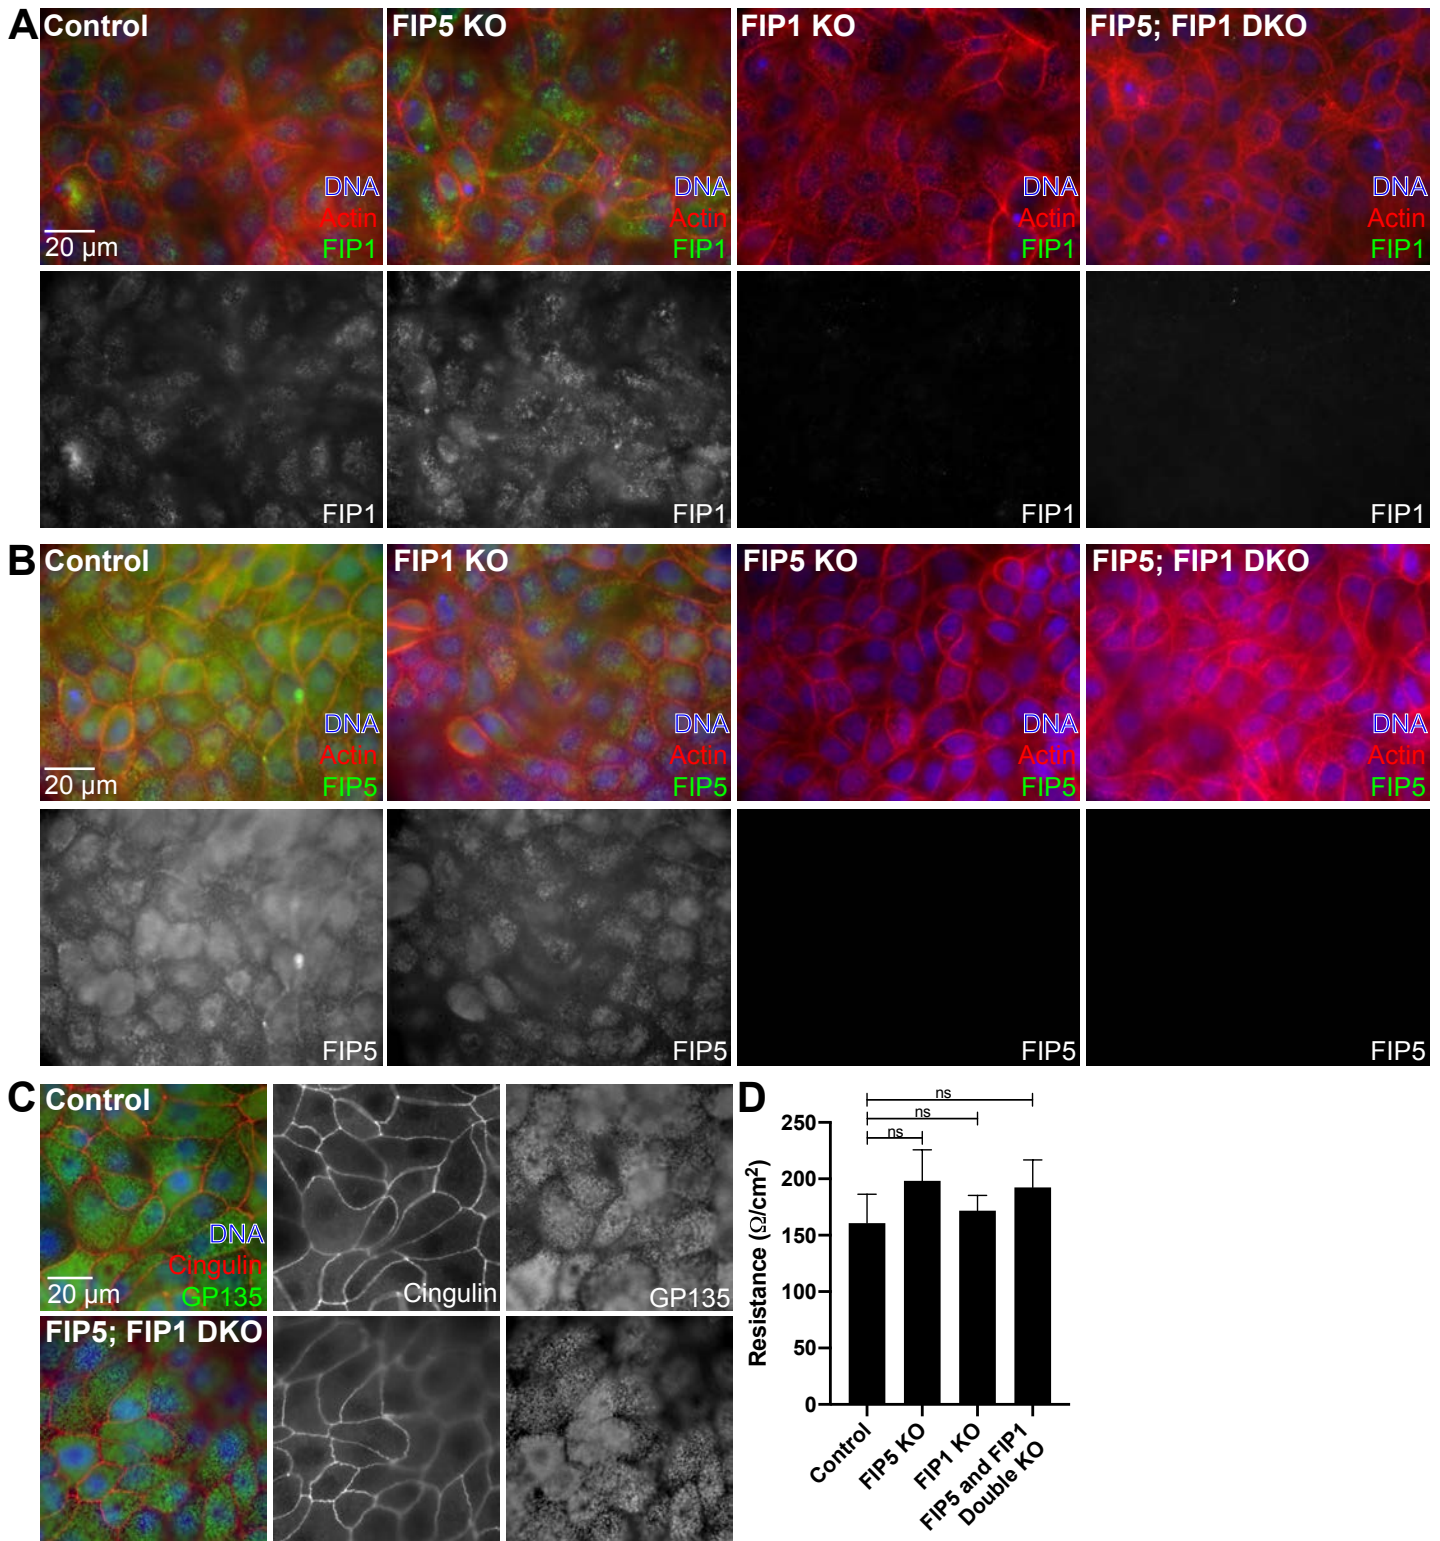

**Figure S4.** (A) Wild-type, FIP5 KO, FIP1 KO, and FIP5 and FIP1 double KO MDCK cells grown in polarized monolayers and stained for Hoechst (blue), Phalloidin (red) and Fip1 (green). (B) Wild-type, FIP1 KO, FIP5 KO, and FIP5 and FIP1 double KO MDCK cells grown in polarized monolayers and stained for Hoechst (blue), Phalloidin (red) and Fip5 (green). (C) Wild-type and FIP5 and FIP1 double KO MDCK cells grown in polarized monolayers and stained for Hoechst (blue), the tight junction marker Cingulin (red) and the apical membrane marker GP135 (green). (D) Trans-epithelial resistance measurements on wild-type, FIP5 KO, FIP1 KO, and FIP5 and FIP1 double KO MDCK cells grown in polarized monolayers from three biological replicates.

**Table S1. Primer sequences.** Primers were designed using the NCBI/Primer-BLAST tool.

|                         |                                               |
|-------------------------|-----------------------------------------------|
| Fip5a ISH For Antisense | TACAACAAACGCCTCCGCTA                          |
| Fip5a ISH Rev Antisense | TAATACGACTCACTATAGGGCGCGTTGTGCAACAAAACC       |
| Fip5b ISH For Antisense | GAAGCGCTCCGTCCCAAATA                          |
| Fip5b ISH Rev Antisense | TAATACGACTCACTATAGGGTGATTCACTACAATCTCAGACCTCA |
| Fip5a genotyping For    | CCACTGTCTTATGTGCCCGT                          |
| Fip5a genotyping Rev    | TGCTCTTCCGATCCTGAAAGG                         |
| Fip5b genotyping For    | GAGAGCTACAGGTCACCATCC                         |
| Fip5b genotyping Rev    | GCTGTAAATCGGTGTTCTGGG                         |
| Fip5aExon1gRNAolig1     | TAGGCCCCGAGGGTTGCGCGCGA                       |
| Fip5aExon1gRNAolig2     | AAACTCGCGCGCAACCCTCGGG                        |
| Fip5bExon2gRNAolig1     | TAGGTGGAAGAACACCGGAGTA                        |
| Fip5bExon2gRNAolig2     | AAACTACTCCGGTGTTCCTTCCA                       |
| FIP5Bset1For qPCR       | GGCAAACACTATTGTTCCGCTCG                       |
| FIP5Bset1Rev qPCR       | TTGTTGCGGGTGAAGTGGAT                          |
| FIP5Bset2For qPCR       | AAATCCAGGACGATCTGCTCT                         |
| FIP5Bset2Rev qPCR       | CGCTGCTTCTTGATCTCCAAT                         |
| Rpl13aFor qPCR          | TCTGGAGGACTGTAAGAGGTATGC                      |
| Rpl13aRev qPCR          | AGACGCACAATCTTGAGAGCAG                        |
| GAPDHFor qPCR           | GTGGAGTCTACTGGTGTCTTC                         |
| GAPDHRev qPCR           | GTGCAGGAGGCATTGCTTACA                         |
| FIP1KO gRNA             | GTGATAACCCAAGGGCACTG                          |
| FIP5KO gRNA             | GGGTTCAATTTGGGGTCACAT                         |
